# Supplementary material for: Effects of Different Planting Densities on Photosynthesis in Maize Determined via Prompt Fluorescence, Delayed Fluorescence and P700 Signals
Source: PubMed Central journal article supplement (PMC7910836; doi:10.3390/plants10020276), 2021-01-31
Supplement: plants-10-00276-s001.pdf [file plants-10-00276-s001.pdf]

Article

# Effects of different planting densities on photosynthesis in maize determined via prompt fluorescence, delayed fluorescence and P700 signals

Wanying Chen <sup>1,†</sup>, Bo Jia <sup>2,†</sup>, Junyu Chen <sup>1</sup>, Yujiao Feng <sup>1</sup>, Yue Li <sup>1</sup>, Miantai Chen <sup>1</sup>, Huanhuan Liu <sup>1</sup> and Zhitong Yin <sup>1,\*</sup>

<sup>1</sup> Jiangsu Key Laboratory of Crop Genetics and Physiology/Co-Innovation Center for Modern Production Technology of Grain Crops/Key Laboratory of Plant Functional Genomics of the Ministry of Education/Joint International Research Laboratory of Agriculture & Agri-Product Safety of the Ministry of Education, Yangzhou University, Yangzhou, 225009, China; [1533186140@qq.com](mailto:1533186140@qq.com) (W.C.); [2577460773@qq.com](mailto:2577460773@qq.com) (J.C.); [952389585@qq.com](mailto:952389585@qq.com) (Y.F.); [1032141759@qq.com](mailto:1032141759@qq.com) (Y.L.); [tocmt@qq.com](mailto:tocmt@qq.com) (M.C.); [Liuhh@yzu.edu.cn](mailto:Liuhh@yzu.edu.cn) (H.L)

<sup>2</sup> Huaiyin Institute of Agricultural Sciences of Xuhuai Region in Jiangsu, Huaian 223001, China; [jiabo85@163.com](mailto:jiabo85@163.com) (B.J)

\* Correspondence: [ztyin@yzu.edu.cn](mailto:ztyin@yzu.edu.cn) (Z.Y)

<sup>†</sup> Those authors contributed equally to this work

**Table S1.** Planting density of the maize in field.

| Planting Density<br>(plants ha <sup>-1</sup> ) | Treatment | Row Spacing(m) | Plant Spacing(m) |
|------------------------------------------------|-----------|----------------|------------------|
| 45000                                          | D1        | 0.6            | 0.43             |
| 67500                                          | D2        | 0.6            | 0.27             |
| 90000                                          | D3        | 0.6            | 0.2              |
| 112500                                         | D4        | 0.6            | 0.15             |

**Table S2.** Formulae and glossary of terms used by the JIP-test for Chl a fluorescence transient OJIP analysis.

| Term/Formula                                                                                                      |                                                                                                                                                |
|-------------------------------------------------------------------------------------------------------------------|------------------------------------------------------------------------------------------------------------------------------------------------|
| F <sub>t</sub>                                                                                                    | Fluorescence at time t after the onset of actinic illumination                                                                                 |
| F <sub>O</sub> ≅ F <sub>20μs</sub> or F <sub>50μs</sub>                                                           | Minimal fluorescence, when all PSII RCs are open                                                                                               |
| F <sub>L</sub> = F <sub>150μs</sub>                                                                               | Fluorescence intensity at the L-step (150 μs) of OJIP                                                                                          |
| F <sub>K</sub> = F <sub>300μs</sub>                                                                               | Fluorescence intensity at the K-step (300 μs) of OJIP                                                                                          |
| F <sub>J</sub> = F <sub>2ms</sub>                                                                                 | Fluorescence intensity at the J-step (2 ms) of OJIP                                                                                            |
| F <sub>I</sub> = F <sub>30ms</sub>                                                                                | Fluorescence intensity at the I-step (30 ms) of OJIP                                                                                           |
| F <sub>P</sub> = F <sub>M</sub>                                                                                   | Maximal recorded fluorescence intensity, at peak P of OJIP                                                                                     |
| F <sub>V</sub> = F <sub>M</sub> - F <sub>O</sub>                                                                  | Maximal variable fluorescence                                                                                                                  |
| V <sub>t</sub> = (F <sub>t</sub> - F <sub>O</sub> ) / (F <sub>M</sub> - F <sub>O</sub> )                          | Relative variable fluorescence at time t                                                                                                       |
| V <sub>K</sub> = (F <sub>K</sub> - F <sub>O</sub> ) / (F <sub>M</sub> - F <sub>O</sub> )                          | Relative variable fluorescence at the K-step                                                                                                   |
| V <sub>J</sub> = (F <sub>J</sub> - F <sub>O</sub> ) / (F <sub>M</sub> - F <sub>O</sub> )                          | Relative variable fluorescence at the J-step                                                                                                   |
| W <sub>t</sub> = (F <sub>t</sub> - F <sub>O</sub> ) / (F <sub>J</sub> - F <sub>O</sub> )                          | Relative variable fluorescence F <sub>V</sub> to the amplitude F <sub>J</sub> - F <sub>O</sub>                                                 |
| W <sub>L</sub> = W <sub>150μs</sub> = (F <sub>150μs</sub> - F <sub>O</sub> ) / (F <sub>J</sub> - F <sub>O</sub> ) | Relative variable fluorescence at the L-step to the amplitude F <sub>J</sub> - F <sub>O</sub>                                                  |
| W <sub>K</sub> = W <sub>300μs</sub> = (F <sub>300μs</sub> - F <sub>O</sub> ) / (F <sub>J</sub> - F <sub>O</sub> ) | Relative variable fluorescence at the K-step to the amplitude F <sub>J</sub> - F <sub>O</sub>                                                  |
| M <sub>O</sub> = 4(F <sub>300μs</sub> - F <sub>O</sub> ) / (F <sub>M</sub> - F <sub>O</sub> )                     | Approximated initial slope (in ms <sup>-1</sup> ) of the fluorescence transient normalized on the maximal variable fluorescence F <sub>V</sub> |
| W <sub>OK</sub> = (F <sub>t</sub> - F <sub>O</sub> ) / (F <sub>K</sub> - F <sub>O</sub> )                         | Ratio of variable fluorescence F <sub>t</sub> - F <sub>O</sub> to the amplitude F <sub>K</sub> - F <sub>O</sub>                                |
| W <sub>OJ</sub> = (F <sub>t</sub> - F <sub>O</sub> ) / (F <sub>J</sub> - F <sub>O</sub> )                         | Ratio of variable fluorescence F <sub>t</sub> - F <sub>O</sub> to the amplitude F <sub>J</sub> - F <sub>O</sub>                                |
| W <sub>OI</sub> = (F <sub>t</sub> - F <sub>O</sub> ) / (F <sub>I</sub> - F <sub>O</sub> )                         | Ratio of variable fluorescence F <sub>t</sub> - F <sub>O</sub> to the amplitude F <sub>I</sub> - F <sub>O</sub>                                |
| φ <sub>P</sub> = PHI(P <sub>t</sub> ) = TR <sub>t</sub> / ABS = 1 - F <sub>t</sub> / F <sub>M</sub>               | Quantum yield for primary photochemistry at any time t                                                                                         |
| φ <sub>P</sub> = PHI(P <sub>O</sub> ) = TR <sub>O</sub> / ABS = 1 - F <sub>O</sub> / F <sub>M</sub>               | Maximum quantum yield for primary photochemistry                                                                                               |

|                                                                                                                                                          |                                                                                                                                            |
|----------------------------------------------------------------------------------------------------------------------------------------------------------|--------------------------------------------------------------------------------------------------------------------------------------------|
| $\psi E_o = \text{PSI}_o = \text{ET}_o / \text{TR}_o = (1 - V_i)$                                                                                        | Probability that an electron moves further than $Q_A^-$                                                                                    |
| $\varphi E_o = \text{PHI}(E_o) = \text{ET}_o / \text{ABS} = (1 - F_o / F_M) / (1 - V_i)$                                                                 | Quantum yield for electron transport (ET)                                                                                                  |
| $\varphi D_o = \text{PHI}(D_o) = 1 - \varphi P_o = F_o / F_M$                                                                                            | Quantum yield (at $t = 0$ ) of energy dissipation                                                                                          |
| $\varphi R_o = \text{RE}_o / \text{ABS} = \varphi P_o \times \psi E_o \times \delta R_o = \varphi P_o \times (1 - V_i)$                                  | Quantum yield for reduction of the end electron acceptors on the PSI acceptor side (RE)                                                    |
| $\delta R_o = \text{RE}_o / \text{ET}_o = (1 - V_i) / (1 - V_i)$                                                                                         | Probability that an electron is transported from the reduced intersystem electron acceptors to the final electron acceptors of PSI (RE)    |
| $\gamma \text{RC} = \text{CHIRC} / \text{CHI}_{\text{total}} = \text{RC} / (\text{ABS} + \text{RC})$                                                     | Probability that a PSII Chl molecule functions as RC                                                                                       |
| $\text{ABS} / \text{CS} = \text{CHI} / \text{CS}$                                                                                                        | Absorption flux per Cs                                                                                                                     |
| $\text{TR}_o / \text{CS} = \varphi P_o \times (\text{ABS} / \text{CS})$                                                                                  | Trapped energy flux per Cs                                                                                                                 |
| $\text{RC} / \text{CS} = \varphi P_o \times (V_j / M_o) \times (\text{ABS} / \text{CS})$                                                                 | $Q_A^-$ -reducing RCs per Cs                                                                                                               |
| $\text{PI}_{\text{ABS}} = \frac{\gamma \text{RC}}{1 - \gamma \text{RC}} \times \frac{\varphi P_o}{1 - \varphi P_o} \times \frac{\psi E_o}{1 - \psi E_o}$ | Performance index (potential) for energy conservation from photons absorbed by PSII to the reduction of the intersystem electron acceptors |

Subscript "o" indicates that the parameter refers to the onset of illumination, when all RCs are assumed to be open.

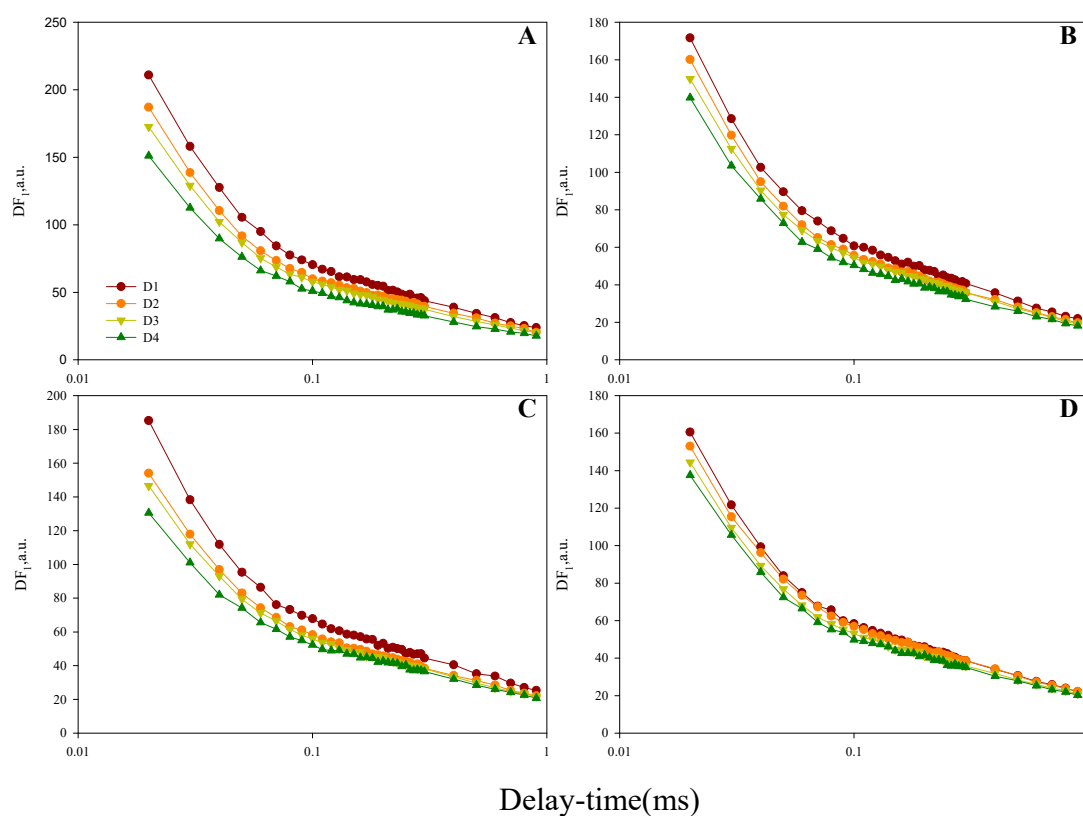

**Figure S1.** Kinetics of delayed fluorescence DF (in arbitrary units) at the characteristic steps I1 (7 ms JIP-time) of the two maize hybrids under different planting densities. A--B: 2019 data; C--D: 2020 data. (A, C): Absolute values of Zhengdan958. (C, D): Absolute values of Xianyu335. Signals are plotted on a logarithmic time scale.
